# Supplementary material
Source: publisher site journal article supplement (https://www.dovepress.com/article/392350)
Supplement: Supplementary file 1 [file get_supplementary_file.php]

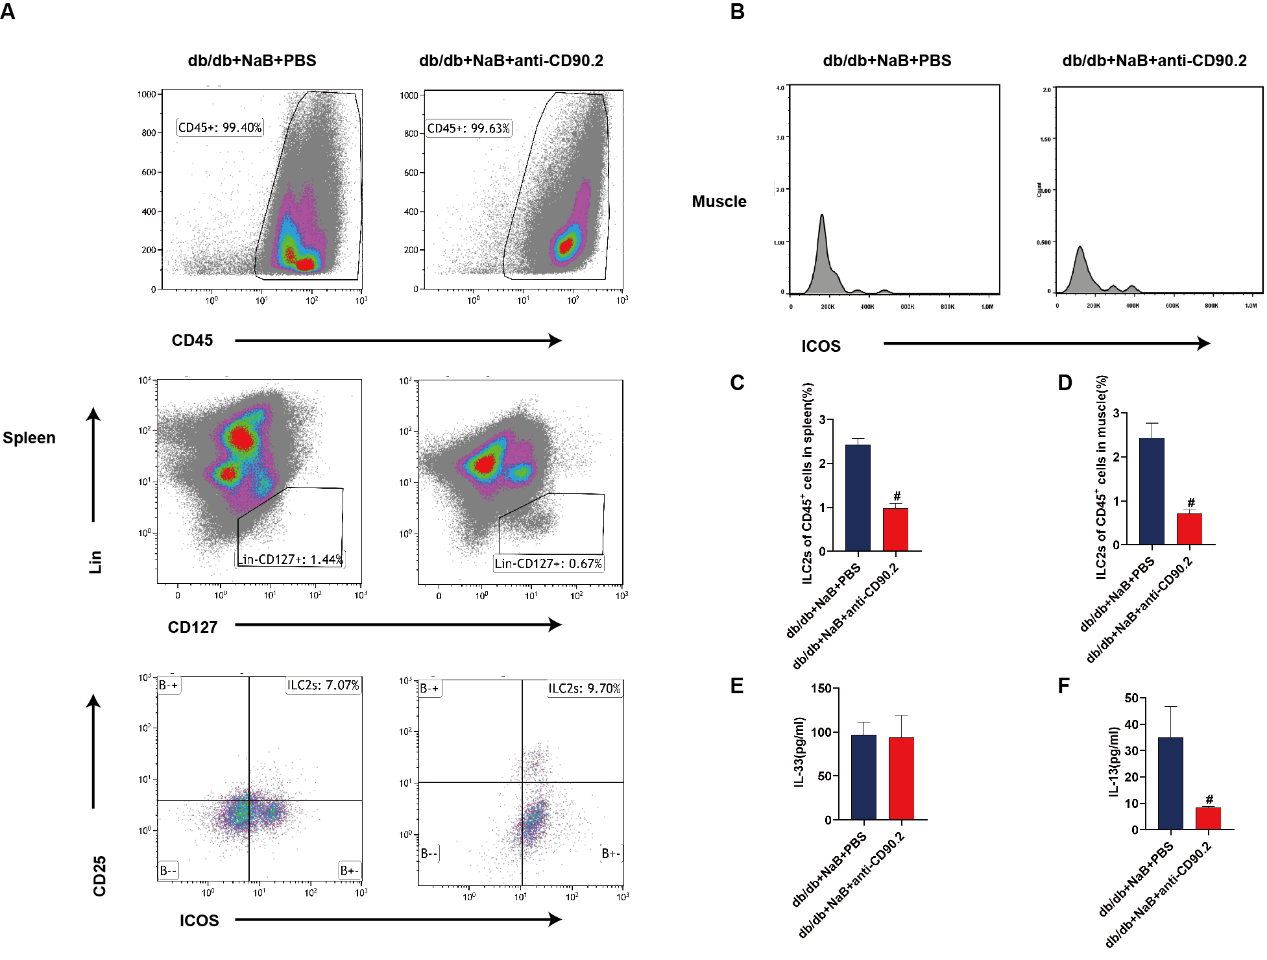


**Figure S1** The depletion effect of ILC2s by anti-CD90.2 was confirmed by flow cytometry.

(**A**) and (**C**) ILC2s in the spleen of anti-CD90.2 group were significantly decreased. (**B**) and (**D**) ILC2s in the muscle of anti-CD90.2 group were significantly decreased. Data are expressed as mean ± SEM (n=4-10 in each group). (**E**) Serum IL-33 level measured by ELISA. (**F**) Serum IL-13 level measured by ELISA. #*P*<0.05 vs. db/db+NaB+PBS group.


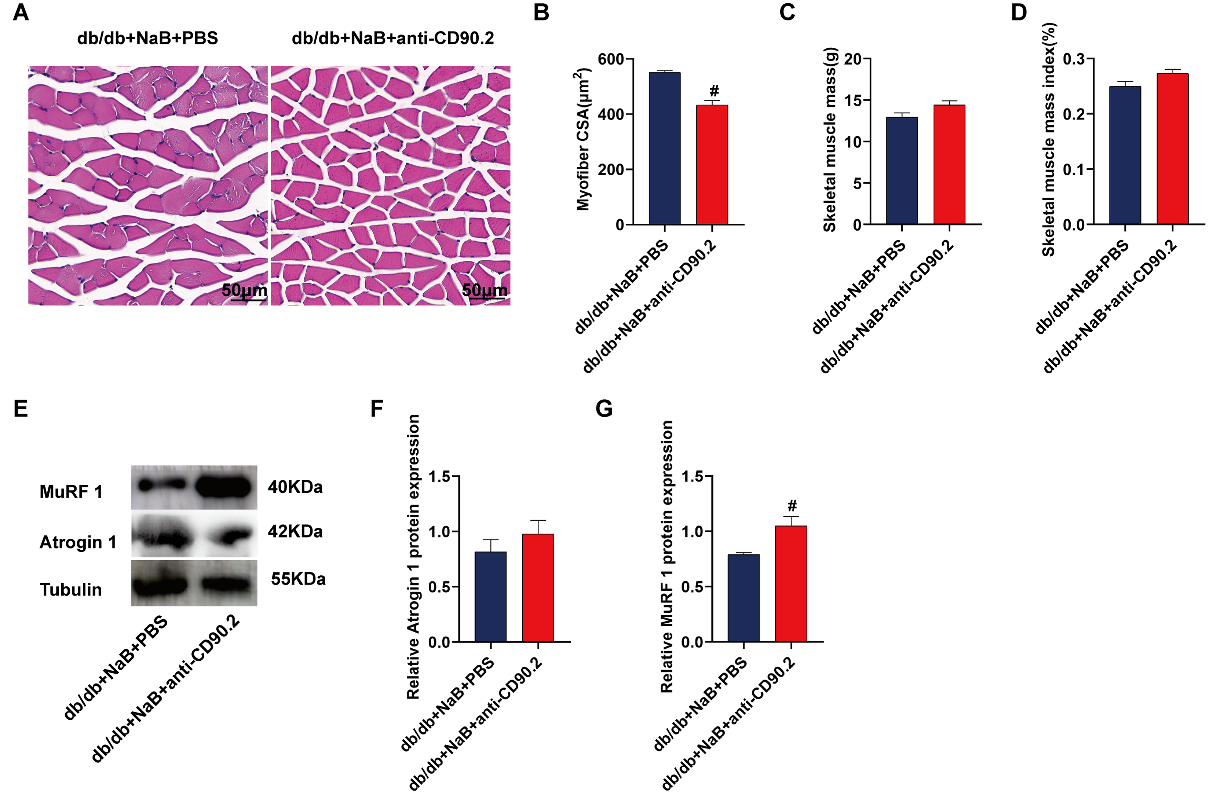


**Figure S2** Depletion of ILC2s deteriorated gastrocnemius myofiber atrophy without affecting muscle mass.

(**A**) Gastrocnemius myofibers from the two groups with HE staining. (**B**) Statistical analysis of cross-sectional area (CSA) of myofiber. (**C**) Statistical analysis of muscle mass measured by dual energy X-ray absorptiometry (DXA). (**D**) Statistical analysis of muscle mass index measured by DXA. (**E**) Protein expression of MuRF 1 and Atrogin 1 in the gastrocnemius of mice in the two groups. (**F**) and (**G**) MuRF 1, Atrogin 1 and tubulin were detected. The histogram showed the grayscale value ratio. #*P*<0.05 vs. db/db+NaB+PBS group. The bar represents 50 μm.


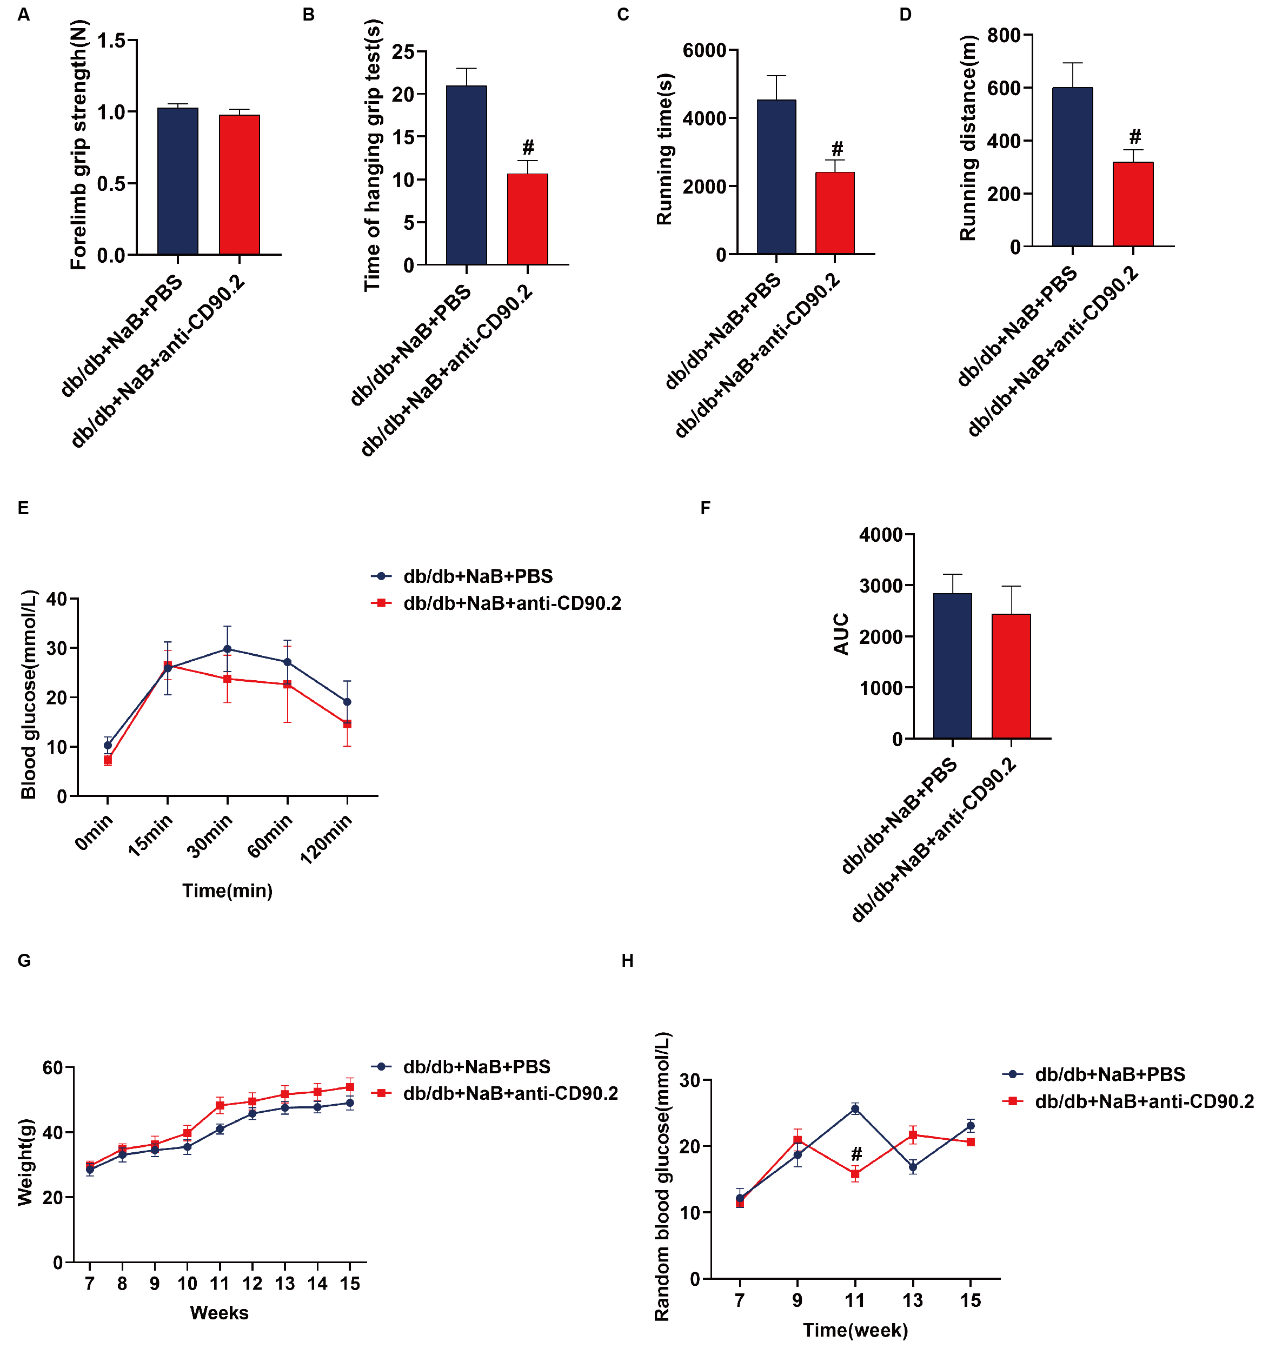


**Figure S3** Depletion of ILC2s had no effect on IPGTT of db/db mice and aggravated impaired muscle strength and exercise capacity in db/db mice.

(**A**) Statistical analysis of forelimb grip strength. (**B**) Statistical analysis of time of hanging grip test. (**C**) Statistical analysis of treadmill exhaustion running distance. (**D**) Statistical analysis of treadmill exhaustive running time. (**E**) Intraperitoneal glucose tolerance test (IPGTT) curve. (**F**) Statistical analysis of area under the curve (AUC). (**G**) Body weight curve. (**H**) Random blood glucose curve. Data are expressed as mean ± SEM (n=10 in each group). #*P*<0.05 vs. db/db+NaB+PBS group.


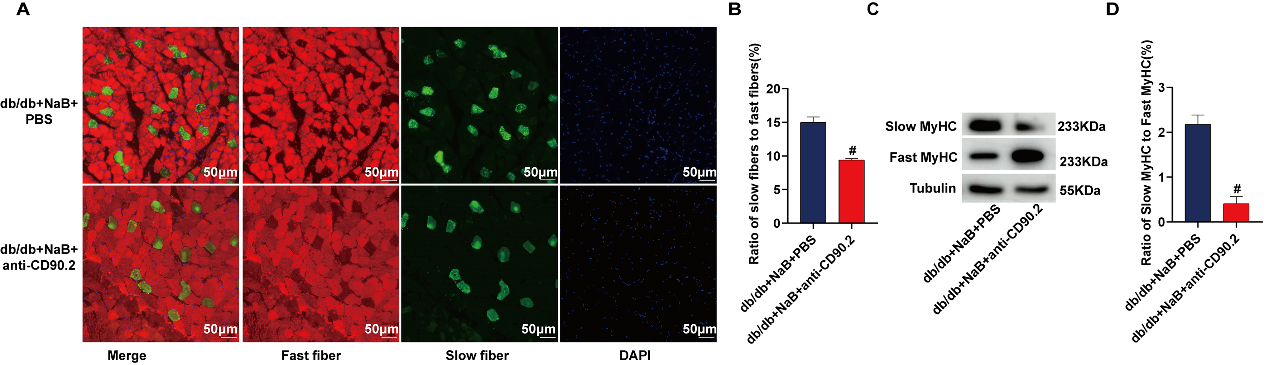


**Figure S4** Depletion of ILC2s and inhibited skeletal muscle fiber type switching of db/db mice.

(**A**) Immunofluorescence staining of fast-twitch muscle fibers and slow-twitch muscle fibers. (**B**) The histogram showed the ratio of slow to fast muscle fibers. (**C**) Protein expression of Slow MyHC and Fast MyHC in the gastrocnemius of mice in the two groups. (**D**) Statistical analysis of the ratio of Slow MyHC/Fast MyHC protein expression. Data are expressed as mean ± SEM (n=6 in each group). #*P*<0.05 vs. db/db+NaB+PBS group. The bar represents 50 μm.


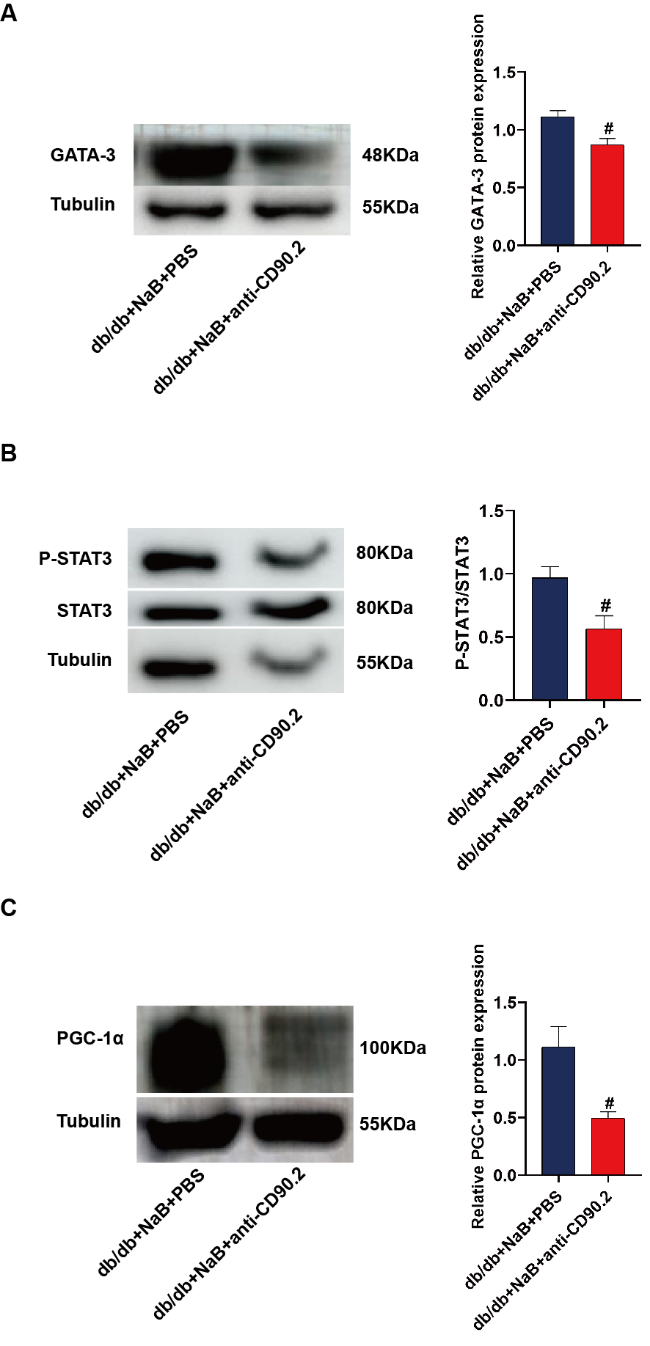


**Figure S5** Depletion of ILC2s reduced slow muscle fiber generation through down-regulation the IL-13/STAT3 pathway.

(**A**) Protein expression of GATA-3 in the gastrocnemius of db/db mice and the histogram showed the grayscale value ratio. (**B**) Protein expression of P-STAT3 and STAT3 in the gastrocnemius of db/db mice and the histogram showed the grayscale value ratio of P-STAT3/STAT3. (**C**) Protein expression of PGC-1α in the gastrocnemius of db/db mice and the histogram showed the grayscale value ratio. Data are expressed as mean ± SEM (n=6 in each group). #*P*<0.05 vs. db/db+NaB+PBS group.
